# Supplementary material
Source: PubMed Central journal article supplement (PMC3847575)
Supplement: cr2013145x1.pdf [file cr2013145x1.pdf]

**A**

|                           |                       |
|---------------------------|-----------------------|
| mmu- <i>miR-142-3p</i> :  | UGUAGUUUCCUACUUUAUGGA |
| hsa- <i>miR-142-3p</i> :  | UGUAGUUUCCUACUUUAUGGA |
| dre- <i>miR-142a-3p</i> : | UGUAGUUUCCUACUUUAUGGA |
| rno- <i>miR-142-3p</i> :  | UGUAGUUUCCUACUUUAUGGA |
| gga- <i>miR-142-3p</i> :  | UGUAGUUUCCUACUUUAUGGA |
| xtr- <i>miR-142-3p</i> :  | UGUAGUUUCCUACUUUAUGGA |

**B**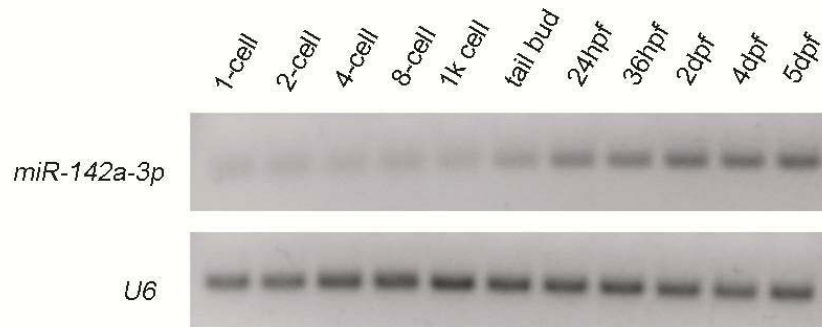

**Supplementary information, Figure S1** Conservation of *miR-142-3p* sequence in vertebrates and its expression during embryogenesis. (A) miRBase analysis showing evolutionarily conserved sequences of *miR-142-3p* in several vertebrate species. mmu, *Mus musculus*; hsa, *Homo sapiens*; dre, *Danio rerio*; rno, *Rattus norvegicus*; gga, *Gallus gallus*; xtr, *Xenopus laevis*. (B) Semi-quantitative RT-PCR of zebrafish *miR-142a-3p* from 1-cell stage to 5 dpf using *U6* as an internal control.
