# Supplementary material
Source: PubMed Central journal article supplement (PMC3847575)
Supplement: cr2013145x2.pdf [file cr2013145x2.pdf]

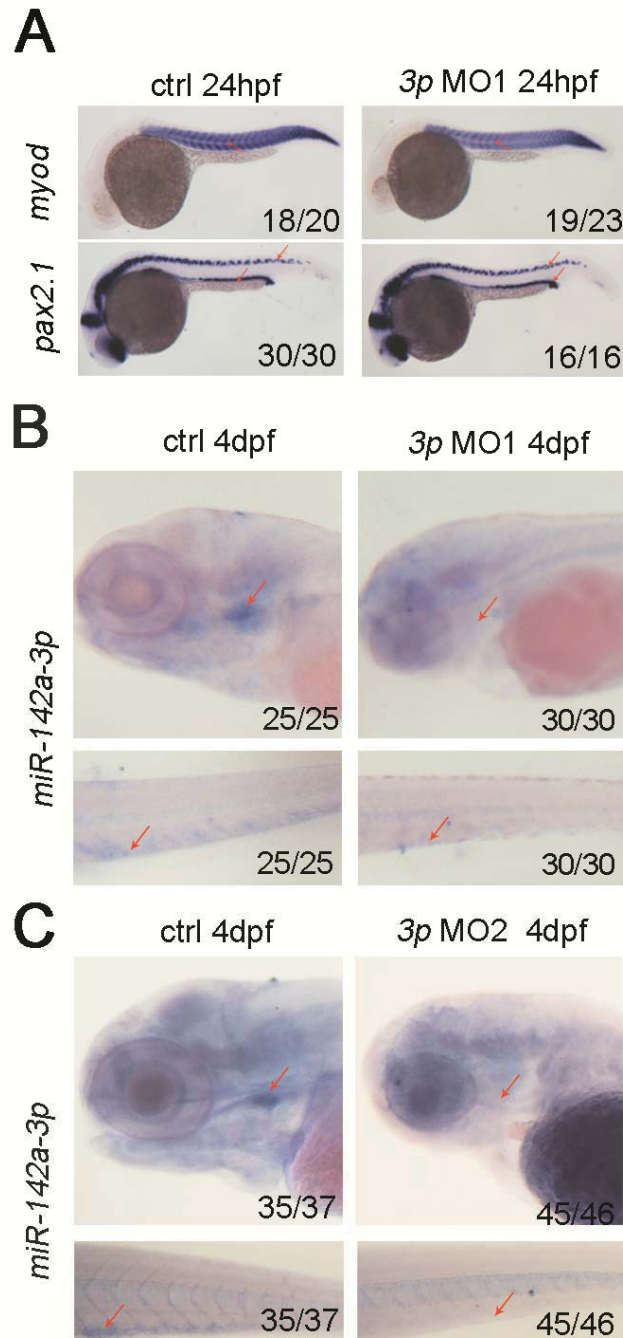

**Supplementary information, Figure S2** Unaltered expression of selected developmental markers and decreased expression of *miR-142a-3p* in embryos injected with 3p MO1 or MO2. (A) WISH analysis showing normal expression of *myod*, and *pax2.1* in *miR-142a-3p* morphants at 24 hpf. (B-C) WISH analysis showing decrease of endogenous expression of *miR-142a-3p* in the thymus and CHT in embryos injected with 3p MO1 (A) or MO2 (B).
