# Supplementary material
Source: PubMed Central journal article supplement (PMC3847575)
Supplement: cr2013145x3.pdf [file cr2013145x3.pdf]

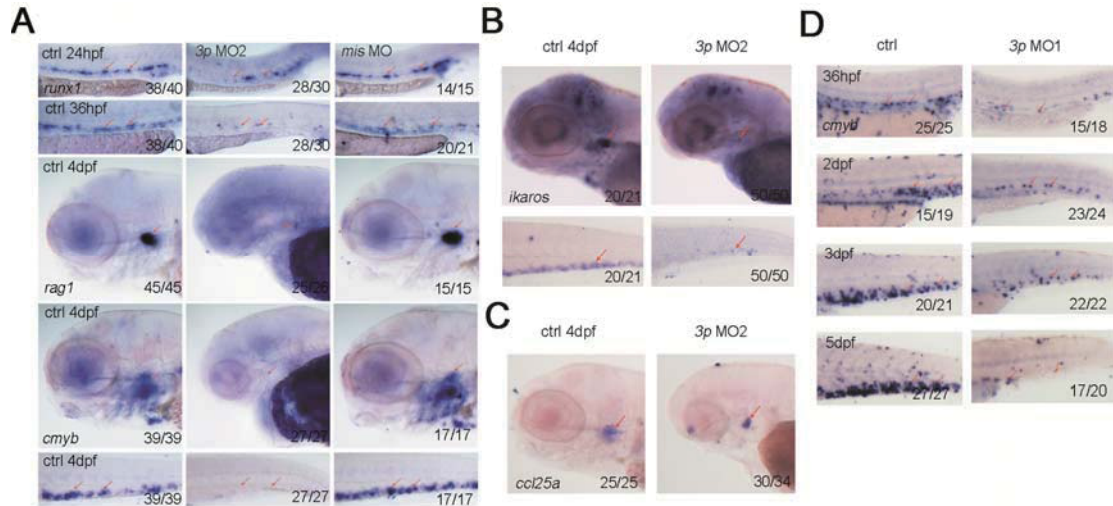

**Supplementary information, Figure S3** *miR-142a-3p* MO-2 injected embryos displays similar HSC and T cell defects compared to *miR-142a-3p* MO1 injected embryos. (A) WISH showed decreased expression of HSC genes *runx1* and *cmyb* and T cell marker *rag1* in embryos injected with *miR-142a-3p* MO2. Embryos injected with control MO or *miR-142a-3p* mismatch MO (*mis 3p* MO) were used as controls. (B) WISH analysis showing reduction of *ikaros* expression in the thymus and CHT in *3p* MO2 injected embryos. (C) Unchanged expression of thymic epithelial cell marker *ccl25a* in *3p* MO2 injected embryos as shown by WISH. (D) Time-course analysis showed continuous decrease of *cmyb* expression in HSCs in the AGM and CHT from 36 hpf to 5 dpf, in *3p* MO1 injected embryos as shown by WISH.
