# Supplementary material
Source: PubMed Central journal article supplement (PMC3847575)
Supplement: cr2013145x4.pdf [file cr2013145x4.pdf]

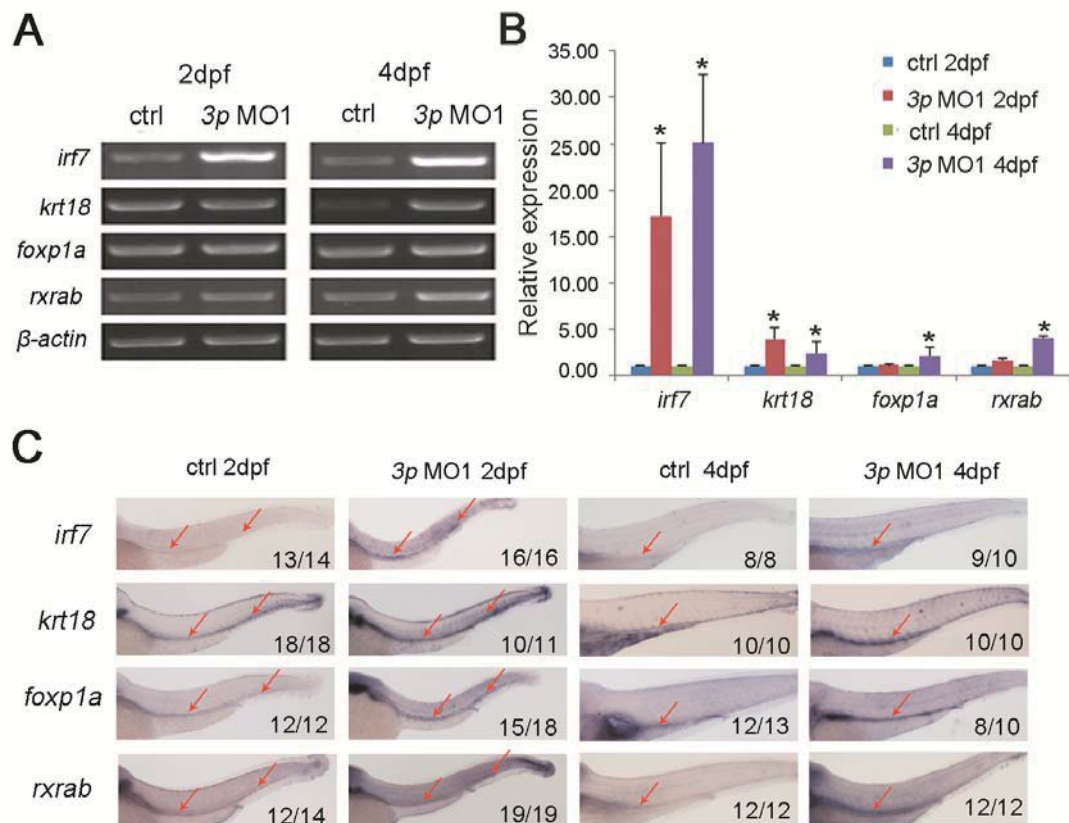

**Supplementary information, Figure S4** Validation of candidate downstream targets of *miR-142a-3p*. (A) Increased expression of predicted targets *irf7*, *krt18*, *foxp1a* and *rxrab* in *miR-142a-3p* morphants, compared to that in controls, as shown by semi-quantitative RT-PCR. (B) Increased expression of *irf7*, *krt18*, *foxp1a* and *rxrab* in *miR-142a-3p* morphants at 2 dpf and 4 dpf as shown by qPCR (mean $\pm$ SD, t test, \*  $p < 0.05$ ,  $n = 3$ ). (C) WISH showed increased expression of *irf7*, *krt18*, *foxp1a* and *rxrab* in *miR-142a-3p* morphants at 2 dpf and 4 dpf. Red arrows show expression in the AGM and CHT region.
