# Supplementary material
Source: PubMed Central journal article supplement (PMC3847575)
Supplement: cr2013145x5.pdf [file cr2013145x5.pdf]

**Supplementary information, Table S1** The MOs designed and used in this work.

| <b>MO</b>                      | <b>Sequence</b>                  |
|--------------------------------|----------------------------------|
| <i>miR-142a-3p</i> MO1         | 5'-TCCATAAAGTAGGAAACACTACTACT-3' |
| <i>miR-142a-3p</i> MO2         | 5'-AGTAGGAAACACTACTACTGTGGCGA-3' |
| mismatch <i>miR-142a-3p</i> MO | 5'-TCGATAAACTAGCAAAGAGTACTACT-3' |
| <i>irf7</i> MO                 | 5'-AGGTTTGGCATTGTGCTCTGCATC-3'   |
