# Supplementary material
Source: PubMed Central journal article supplement (PMC3847575)
Supplement: cr2013145x6.pdf [file cr2013145x6.pdf]

**Supplementary information, Table S2** The PCR primers used in qPCR assay and the sequences of *mmu-miR-142-3p* inhibitor and duplex.

| <b>Name</b>                             | <b>Sequence</b>                                         |
|-----------------------------------------|---------------------------------------------------------|
| <i>mir-142a-3p</i> F                    | 5'-GCCGCTGTAGTGTTCCTACTT-3'                             |
| <i>mir-142a-3p</i> R                    | 5'-GTGCAGGGTCCGAGGT-3'                                  |
| <i>krt18</i> F                          | 5'-GCTGCGTGATGACATACA-3'                                |
| <i>krt18</i> R                          | 5'-GGACCTGTTCTGGAGTGT-3'                                |
| <i>rxrab</i> F                          | 5'-ACAAGACTGAACTCGGATG-3'                               |
| <i>rxrab</i> R                          | 5'-AATGCCTCCACCTCTGAT-3'                                |
| <i>foxp1a</i> F                         | 5'-TACGAGTGGAGAATGTGAAG-3'                              |
| <i>foxp1a</i> R                         | 5'-CAGAGGAGAGCCAGTGAT-3'                                |
| <i>gcsfr</i> F                          | 5'-CGACTACAGACTCACTACAG-3'                              |
| <i>gcsfr</i> R                          | 5'-AGTATCAGCGTGGATGTTC-3'                               |
| <i>u 6</i> F                            | 5'-TTGGTCTGATCTGGCACATATAC-3'                           |
| <i>u 6</i> R                            | 5'- AAAAATATGGAGCGCTTCACG-3'                            |
| <i>runx1</i> F                          | 5'-CGTCTTCACAAACCCTCCTCAA-3'                            |
| <i>runx1</i> R                          | 5'-GCTTTACTGCTTCATCCGGCT-3'                             |
| <i>irf7</i> F                           | 5'-CAAGGAACAACCTGCTTAGT-3'                              |
| <i>irf7</i> R                           | 5'-GATGGTGTAATCTGGAGAC-3'                               |
| $\beta$ -actin F                        | 5'-GCTGTTTTCCCTCCATTGTT-3'                              |
| $\beta$ -actin R                        | 5'-TCCCATGCCAACCATCACT-3'                               |
| <i>mmu-miR-142-3p</i> inhibitor         | 5'-UCCAUAAGUAGGAAACACUACA-3'                            |
| <i>mmu-miR-142-3p</i> inhibitor control | 5'-CAGUACUUUUGUGUAGUACAA-3'                             |
| <i>mmu-miR-142-3p</i> duplex            | 5'-UGUAGUGUUUCCUACUUUAUGGACAUA<br>AGUAGGAAACACUACAUU-3' |
| <i>mmu-miR-142-3p</i> duplex control    | 5'-UUCUCCGAACGUGUCACGUUUACGUGACA<br>CGUUCGGAGAAUU-3'    |
